# Common Variants in *CYP2R1* and *GC* Genes Predict Vitamin D Concentrations in Healthy Danish Children and Adults

Janna Nissen<sup>1\*</sup>, Lone Banke Rasmussen<sup>1</sup>, Gitte Ravn-Haren<sup>2</sup>, Elisabeth Wreford Andersen<sup>3</sup>, Bettina Hansen<sup>4</sup>, Rikke Andersen<sup>1</sup>, Heddie Mejborn<sup>1</sup>, Katja Howarth Madsen<sup>1</sup>, Ulla Vogel<sup>5</sup>

**1** Division of Nutrition, National Food Institute, Technical University of Denmark, Søborg, Denmark, **2** Division of Toxicology and Risk Assessment, National Food Institute, Technical University of Denmark, Søborg, Denmark, **3** Department of Applied Mathematics and Computer Science, Technical University of Denmark, Lyngby, Denmark, **4** Department of Biomedicine, Aarhus University, Aarhus, Denmark, **5** National Research Centre for the Working Environment, Copenhagen, Denmark

## Abstract

Environmental factors such as diet, intake of vitamin D supplements and exposure to sunlight are known to influence serum vitamin D concentrations. Genetic epidemiology of vitamin D is in its infancy and a better understanding on how genetic variation influences vitamin D concentration is needed. We aimed to analyse previously reported vitamin D-related polymorphisms in relation to serum 25(OH)D concentrations in 201 healthy Danish families with dependent children in late summer in Denmark. Serum 25(OH)D concentrations and a total of 25 SNPs in *GC*, *VDR*, *CYP2R1*, *CYP24A1*, *CYP27B1*, *C10or88* and *DHCR7/NADSYN1* genes were analysed in 758 participants. Genotype distributions were in Hardy–Weinberg equilibrium for the adult population for all the studied polymorphisms. Four SNPs in *CYP2R1* (rs1562902, rs7116978, rs10741657 and rs10766197) and six SNPs in *GC* (rs4588, rs842999, rs2282679, rs12512631, rs16846876 and rs17467825) were statistically significantly associated with serum 25(OH)D concentrations in children, adults and all combined. Several of the SNPs were in strong linkage disequilibrium, and the associations were driven by *CYP2R1*-rs10741657 and rs10766197, and by *GC*-rs4588 and rs842999. Genetic risk score analysis showed that carriers with no risk alleles of *CYP2R1*-rs10741657 and rs10766197, and/or *GC* rs4588 and rs842999 had significantly higher serum 25(OH)D concentrations compared to carriers of all risk alleles. To conclude, our results provide supporting evidence that common polymorphisms in *GC* and *CYP2R1* are associated with serum 25(OH)D concentrations in the Caucasian population and that certain haplotypes may predispose to lower 25(OH)D concentrations in late summer in Denmark.

**Citation:** Nissen J, Rasmussen LB, Ravn-Haren G, Andersen EW, Hansen B, et al. (2014) Common Variants in *CYP2R1* and *GC* Genes Predict Vitamin D Concentrations in Healthy Danish Children and Adults. PLoS ONE 9(2): e89907. doi:10.1371/journal.pone.0089907

**Editor:** Nathan A. Ellis, University of Illinois at Chicago, United States of America

**Received:** September 25, 2013; **Accepted:** January 23, 2014; **Published:** February 27, 2014

**Copyright:** © 2014 Nissen et al. This is an open-access article distributed under the terms of the Creative Commons Attribution License, which permits unrestricted use, distribution, and reproduction in any medium, provided the original author and source are credited.

**Funding:** The work was supported by grants from the Danish Dairy Research Fund, Centre for Advanced Food Studies, and The European Region Development Fund. The funders had no role in study design, data collection and analysis, decision to publish, or preparation of the manuscript.

**Competing Interests:** The authors have declared that no competing interests exist.

\* E-mail: ioni@food.dtu.dk

## Introduction

Vitamin D deficiency is a widespread problem in developed countries [1]. Severe vitamin D deficiency causes osteomalacia, or childhood rickets, osteoporosis and fractures because of reduced calcium absorption [2]. Low vitamin D concentrations may also be related to various non-skeletal health outcomes, including cardiovascular diseases [3], obesity [4], diabetes [5], asthma [6], multiple sclerosis [7], occurrence of a large range of cancer diseases [8] and overall mortality [9,10].

In humans, vitamin D is produced mainly in the skin during exposure to solar ultraviolet blue (UVB) radiation (270–300 nm) [11]. UVB radiation converts 7-dehydrocholesterol (7-DHC) in the skin to pre-vitamin D<sub>3</sub>, which immediately undergoes a thermal isomerization to vitamin D<sub>3</sub>. Dietary sources provide two forms of vitamin D: Vitamin D<sub>2</sub> (ergocalciferol) derived from invertebrates (plants and fungi) and vitamin D<sub>3</sub> (cholecalciferol) derived from animal sources. Ingested vitamins D<sub>2</sub> and D<sub>3</sub> are absorbed in the small intestine and transported with chylomicrons and lipoproteins to the liver, whereas dermally synthesized vitamin

D<sub>3</sub> diffuses via the blood to the liver tightly bound to group-specific complement (GC) [12].

Dietary or dermally synthesized vitamin D (hereafter “D” refers to D<sub>2</sub> and D<sub>3</sub>) undergoes a series of enzymatic conversions in the liver and kidneys to become biologically active. The hepatic enzyme 25-hydroxylase (*CYP2R1*) converts vitamin D to 25-hydroxyvitamin D (25(OH)D). This is the major circulating form of vitamin D in the blood. To become biologically active, 25(OH)D is converted to 1,25-dihydroxyvitamin D (1,25(OH)<sub>2</sub>D). This occurs mainly in the kidneys, but also in other tissues expressing the enzyme 25(OH)D-1 $\alpha$ -hydroxylase (*CYP27B1*). The biological effect of vitamin D is mediated when 1,25(OH)<sub>2</sub>D binds to the vitamin D receptor (*VDR*). To prevent excessive vitamin D signalling in the target organs, 1,25(OH)<sub>2</sub>D limits its own activity by inducing 24-hydroxylase (*CYP24A1*) converting 1,25(OH)<sub>2</sub>D to the biologically inactive water-soluble calcitroic acid which is excreted in the bile [1,12,13].

The best biomarker of vitamin D concentration is the serum 25(OH)D concentration. Approximately 25% of the inter-individual variability in plasma 25(OH)D concentrations can be

explained by external factors such as diet, regular use of vitamin D supplements and exposure to sunlight (dependent on season and latitude) [14,15]. Genetic factors may contribute to vitamin D concentrations. Results from twin and family-based studies indicate that blood vitamin D concentrations to some extent are under genetic control. The results have been inconsistent with a wide variability in heritability estimates ranging from 23 to 80% [15–21]. Furthermore, ethnic differences in vitamin D concentrations have also been described [22].

Genetic epidemiology of vitamin D is in its infancy and a better understanding of how genetic variation influences vitamin D concentrations is needed. A growing number of studies have uncovered polymorphisms associated with vitamin D concentrations. By candidate gene analysis, five genes have been found, including *GC*, *CYP24A1*, *CYP2R1*, *CYP27B1* and *VDR* [23]. Recently, two genome-wide association studies (GWAS) of vitamin D [24,25] confirmed the associations of common variants in *GC* and *CYP2R1* genes. Furthermore, nicotinamide adenine dinucleotide synthetase-1/7-dehydrocholesterol reductase (*NADSYN1/DHCR7*), and the region harbouring the open-reading frame 88 (*C10orf88*) on chromosome 10q26.13 were also found to be associated with vitamin D concentrations in blood.

In Denmark, low vitamin D status is common during the winter due to inadequate dietary intakes and lack of solar radiation from September to April [26]. We assessed vitamin D status in late summer (September to October), where the Danes vitamin D concentration peaks but are not saturated [27], in families with a broad span in age in both children and adults. In children, the role of genetic variation in determining serum 25(OH)D concentrations is an understudied area.

In this study, we analysed previously reported vitamin D-related polymorphisms in relation to serum 25(OH)D concentrations in 201 healthy Danish families with dependent children to confirm previous findings and thus help identifying individuals that may have increased risk of developing vitamin D insufficiency.

## Subjects and Methods

### Study population

The present cross-sectional study used baseline data from the VitmaD intervention study described in detail elsewhere [28]. Briefly, 201 Danish families with dependent children ( $n = 782$ ) were enrolled. The participants were 4- to 60-years old. Baseline blood samples were collected in September and October 2010 and were obtained from 770 participants. The study was conducted according to the guidelines in the Declaration of Helsinki and the protocol was approved by the Research Ethics Committee of the Capital Region of Denmark (H-4-2010-020) and registered at <http://clinicaltrials.gov> (NCT01184716). All adult participants and guardians on the behalf of the children participants gave written consent to participate.

### DNA extraction and genotyping

DNA was extracted from peripheral blood leukocytes as described by Miller *et al.* [29] and stored in TE-buffer at  $-80^{\circ}\text{C}$ . The DNA was diluted to 10 ng/ $\mu\text{l}$  using a Nanodrop<sup>®</sup> ND-1000 Spectrophotometer (Thermo Fisher Scientific Inc., Wilmington). Single nucleotide polymorphisms (SNPs) were genotyped using the Sequenom MassARRAY iPLEX Gold platform (Sequenom, San Diego, California) at the Department of Biomedicine, Aarhus University, Denmark. Genotyping was successful for 762 participants (99.0%). To confirm the accuracy of genotyping duplicate samples (10%) yielded 100% reproducibility.

All SNPs were located in or near genes involved in vitamin D synthesis, activation or degradation. The following SNPs were selected on the basis of evidence of significant association in previous studies: *CYP2R1* (rs1562902; rs7116978; rs10741657; rs10766197) *CYP24A1* (rs229624; rs2426496; rs4809960; rs6013897; rs17219315) *CYP27B1* (rs10877012) *C10orf88* (rs6599638) *DHCR7/NADSYN1* (rs1790349; rs12785878) *GC* (rs4588; rs222020; rs842999-triallelic; rs2882679; rs2298849; rs12512631; rs16846876; rs17467825) *VDR* (rs731236 (TaqI), rs757343 (TruI); rs7139166; rs10783219).

Deviation from Hardy–Weinberg equilibrium (HWE) was tested for the adult population using Chi-square test with Bonferroni's correction (P-value 0.05/25 SNPs = 0.002). No significant deviation from HWE was observed. Linkage disequilibrium (LD) between polymorphisms was evaluated using Pearson's  $r$ , SNAP version 2.2 (<http://www.broadinstitute.org/mpg/snap/ldsearchpw.php>) and Haploview software version 4.2 for the adult population.

### Measurement of serum 25(OH)D concentrations

Measurements of serum 25(OH)D concentrations are described in detail elsewhere [28]. Briefly, blood samples were obtained without prior fasting and serum was stored in aliquots at  $-80^{\circ}\text{C}$  until analysis. Measurements of serum 25(OH)D concentrations relied on the determination of both 25(OH)D<sub>2</sub> and 25(OH)D<sub>3</sub> and were conducted by isotope dilution liquid chromatography tandem mass spectrometry (LC-MS/MS) at Clinical Biochemical Department, Holbæk Hospital, Denmark. As primary calibrator the standard reference material, vitamin D in humans (SRM 972) from the National Institute of Standards and Technology was used. The analytic quality of 25(OH)D assay was assured by Vitamin D External Quality Assessment Scheme certification and the mean bias was  $-3.2\%$ . The Inter-assay CVs for 25(OH)D<sub>2</sub> were 7.6% and 4.6% at 43 and 150 nmol/L, respectively, and for 25(OH)D<sub>3</sub> 2.2% and 2.8% at 30 and 180 nmol/L, respectively [28]. Of the 762 participants that were successfully genotyped, baseline serum 25(OH)D concentrations were measured for 758 participants.

### Statistical analysis

Statistical analyses were performed using SAS Enterprise Guide 4.3 (SAS Institute, Inc., Cary, USA). Serum 25(OH)D concentrations were log transformed to approximate a normal distribution and all means are presented as geometric means. A nominal P-value of 0.05 was considered statistically significant. Linear mixed models with family as a random factor were applied to account for the possible dependence between the participants. Furthermore, in the linear mixed models the following categorical variables were included: age (4–11, 12–17, 18–40, 41–60 years), sex (male, female), BMI (underweight, normal weight, overweight, obese) according to standards for children [30] and the WHO International standards for adults [31], ski or sun holidays (yes, no), solarium use at least once a week (yes, no), dietary vitamin D (quartiles:  $<1.7$ , 1.7–2.4, 2.5–3.3 and  $>3.3$   $\mu\text{g}/\text{d}$ ), multivitamin and vitamin D supplement users (yes, no). The data were obtained from a self-administered web-based questionnaire and a semi-quantitative food frequency questionnaire based on the last six months. Pearson's  $r$  were calculated on the adult population and were used to assess the degree of linkage between linked SNPs. Haplotypes were inferred manually among the adults, only since the children were not population-based. The inferred haplotype combinations described 100% and 97% of the observed genotypes among the adults for *CYP2R1* and *GC* genes, respectively. Among the children the inferred haplotype combinations described 100%

and 96% of the observed genotypes for *CYP2R1* and *GC* genes, respectively. Each derived haplotype was assigned a number. Homozygote haplotype combinations were numbered with two identical numbers e.g. 11. The combinations of heterozygote haplotypes were given by the combination of the number of each haplotype e.g. 1+ 2 = 12.

Genetic risk scores were calculated as the sum of risk alleles and included as risk factors in linear mixed models adjusted for family and confounding variables. The correlation coefficient for rs10741657, rs10766197, rs4588 and rs842999 were very similar and therefore it was not necessary to weight the score by effect size. All the analyses were performed separately for children, adults and for all combined.

## Results

Genotyping and serum 25(OH)D concentrations were available for 758 participants. Table 1 summarizes the basic characteristics of the study population, previously described in detail elsewhere [28]. The median age among children was 10 years (range: 4 to 17) among adults 41 years (range: 18 to 60) and for all combined 30 years.

Associations between genotypes and serum 25(OH)D concentrations are shown for children, adults and all combined in Table 2. After adjustment for family and confounding factors, all four analysed SNPs in *CYP2R1* were statistically significantly associated with serum 25(OH)D concentrations in all three groups. Furthermore, for all three groups none of the analysed SNPs in *CYP24A1*, *CYP27B1*, *C10orf88* and *DHCR7/NADSYN1* were statistically significantly associated with serum 25(OH)D concentration. For all three groups all analysed SNPs in *GC*, except rs2298849 (in all three groups) and rs222020 (in adults and all), were statistically significantly associated with serum 25(OH)D concentration. The *VDR* rs731236 was only statistically significantly associated with 25(OH)D concentration in all combined and rs757343 was statistically significant in children and all combined. Only SNPs that were statistically significantly associated with 25(OH)D concentrations in children, adults and all combined were included in further analyses.

### Haplotype and genetic risk score analysis of *CYP2R1*

In the adult population, rs10741657-rs7116978 (Pearson's  $r = 0.90$ ), and rs1076697-rs1562902 (Pearson's  $r = -0.86$ , data not shown) were in strong LD. To establish which of the SNPs had the strongest association to serum 25(OH)D concentrations, we assess

the association between one SNP and serum 25(OH)D concentrations while adjusting for the other SNPs, family and confounding factors in a linear mixed model. After adjustment, rs10766197 ( $p = 0.0846$ ) had the strongest association compared to rs1562902 ( $p = 0.8211$ ), and rs10741657 ( $p = 0.2545$ ) had the strongest association compared to rs7116978 ( $p = 0.3087$ , data not shown). In further analysis only rs1076697 and rs10741657 were included.

The two *CYP2R1* variants rs10741657 and rs7116978 formed four haplotypes, where haplotype 1 and 2 were most frequent (Table 3). The possible combinations of the four homozygote haplotype are shown in table 3. One genotype combination could be assigned to both haplotype combinations 12 or 34, but based on the observed haplotype frequencies, the most likely combination was 12. After adjustment for family and confounding factors, carriers of 2 copies of the AG-haplotype (haplotype combination 33) had the highest mean serum 25(OH)D concentration (73.8 (60.1–90.6), 72.9 (57.3–92.5) and 81.3 (66.4–99.6) nmol/L) in children, adults and all combined, respectively. In a linear mixed model, only the homozygous haplotype combinations were included and haplotype combination 44 was excluded because only two participants carried this haplotype combination. The homozygous haplotype combinations were significantly associated with serum 25(OH)D concentrations ( $p = 0.0059$ , 0.0450 and 0.0007) in children, adults and all combined, respectively.

We calculated a genetic risk score (range 0–4) as the sum of the number of G-alleles of rs10741657 and A-alleles of rs10766197 (Figure 1, A). After adjustment for family and confounding factors, carriers of no risk alleles had significantly higher serum 25(OH)D concentrations (74.0 (60.3–90.0), 73.0 (57.5–92.6) and 81.3 (66.4–99.5) nmol/L) compared to carriers of all four risk alleles (61.2 (57.5–92.6), 64.0 (50.6–80.9) and 69.8 (57.0–85.4) nmol/L) in children, adults and all combined, respectively. Overall, there was 20.9, 14.1 and 16.5% difference in serum 25(OH)D concentrations between carrying no risk alleles and carrying all four risk alleles in children, adults or all combined, respectively.

### Haplotype and genetic risk score analysis of *GC*

In the adult population, rs4588 was in strong LD with rs2282679 (Pearson's  $r = 0.997$ ), rs17467825 (Pearson's  $r = 0.997$ ) and rs16846876 (Pearson's  $r = 0.805$ ). Furthermore, rs17467825-rs2282679 (Pearson's  $r = 1.00$ ), and rs2282679-rs16846876 (Pearson's  $r = 0.8021$ , data not shown) were also in strong LD. To establish which of the 4 SNPs had the strongest association to serum 25(OH)D concentrations, we assess the association between one SNP and serum 25(OH)D concentrations while adjusting for

**Table 1.** Basic characteristics of the study population and determinants of serum 25(OH)D concentrations

| Characteristics                                     | Children    | Adults      | All         |
|-----------------------------------------------------|-------------|-------------|-------------|
| Number                                              | 348         | 414         | 762         |
| Female/Male (n/n)                                   | 181/167     | 209/205     | 390/372     |
| Age, median (range)                                 | 10 (4–17)   | 41 (18–60)  | 30 (4–60)   |
| BMI (kg/m <sup>2</sup> )*                           | 17.44±2.89  | 25.47±4.30  | 21.79±5.45  |
| Serum 25(OH)D (nmol/L)*                             | 74.38±17.31 | 74.87±21.70 | 74.65±19.82 |
| Dietary Vitamin D (µg/d)*                           | 2.69±1.35   | 2.96±2.04   | 2.84±1.77   |
| Multivitamin or vitamin D supplement users (yes/no) | 141/203     | 113/297     | 254/500     |
| Solarium use (yes/no)                               | 2/342       | 10/401      | 12/743      |
| Ski or sun holidays (yes/no)                        | 195/149     | 220/191     | 415/340     |

\*Mean ± SD.

doi:10.1371/journal.pone.0089907.t001

**Table 2.** Basic characteristics of the individual SNP and the association with serum 25(OH)D concentrations in children, adults and all combined.

| SNP               | MMAF | HWE  | M/m | Gt | Children (n = 344) |                                |                |                               | Adults (n = 414) |                                |                |                               | All (n = 758) |                                |                |                               |
|-------------------|------|------|-----|----|--------------------|--------------------------------|----------------|-------------------------------|------------------|--------------------------------|----------------|-------------------------------|---------------|--------------------------------|----------------|-------------------------------|
|                   |      |      |     |    | N                  | 25(OH)D,<br>nmol/L<br>(95% CI) | p <sup>1</sup> | P <sub>adj</sub> <sup>2</sup> | N                | 25(OH)D,<br>nmol/L<br>(95% CI) | p <sup>1</sup> | P <sub>adj</sub> <sup>2</sup> | N             | 25(OH)D,<br>nmol/L<br>(95% CI) | p <sup>1</sup> | P <sub>adj</sub> <sup>2</sup> |
| <i>CYP2R1</i>     |      |      |     |    |                    |                                |                |                               |                  |                                |                |                               |               |                                |                |                               |
| <b>rs7116978</b>  | 38.8 | 0.25 | C/T | CC | 124                | 67.6 (65.0–70.2)               | <0.0001        | <0.0001                       | 156              | 67.5 (64.2–71.0)               | 0.0218         | 0.0093                        | 280           | 67.5 (65.3–69.8)               | <0.0001        |                               |
|                   |      |      |     | CT | 158                | 73.9 (71.4–76.6)               |                |                               | 180              | 72.8 (69.5–76.3)               |                |                               | 338           | 73.3 (71.2–75.6)               |                |                               |
|                   |      |      |     | TT | 54                 | 79.1 (74.5–83.9)               |                |                               | 66               | 77.5 (71.8–83.8)               |                |                               | 120           | 78.2 (74.4–82.3)               |                |                               |
| <b>rs10741657</b> | 40.8 | 0.31 | G/A | GG | 118                | 67.9 (65.2–70.7)               | <0.0001        | <0.0001                       | 150              | 66.6 (63.3–70.1)               | 0.0039         | 0.0067                        | 268           | 67.2 (65.0–69.5)               | <0.0001        |                               |
|                   |      |      |     | GA | 175                | 73.9 (71.5–76.4)               |                |                               | 190              | 74.0 (70.7–77.4)               |                |                               | 365           | 73.9 (71.8–76.1)               |                |                               |
|                   |      |      |     | AA | 51                 | 78.8 (74.1–83.7)               |                |                               | 74               | 75.2 (69.9–80.9)               |                |                               | 125           | 76.6 (73.0–80.5)               |                |                               |
| <b>rs1562902</b>  | 45.2 | 0.37 | T/C | TT | 103                | 68.9 (65.9–71.9)               | 0.0233         | 0.0086                        | 129              | 67.5 (63.9–71.4)               | 0.0574         | 0.0353                        | 232           | 68.1 (65.7–70.6)               | 0.0022         |                               |
|                   |      |      |     | TC | 172                | 73.7 (71.2–76.2)               |                |                               | 196              | 73.3 (70.0–76.6)               |                |                               | 368           | 73.5 (71.4–75.6)               |                |                               |
|                   |      |      |     | CC | 69                 | 75.0 (71.0–79.1)               | 79.1           |                               | 89               | 73.4 (68.6–78.5)               |                |                               | 158           | 74.1 (70.9–77.4)               |                |                               |
| <b>rs10766197</b> | 46.9 | 0.15 | G/A | GG | 97                 | 76.0 (72.7–79.5)               | 0.0048         | 0.0006                        | 124              | 73.0 (69.0–77.3)               | 0.0557         | 0.0081                        | 221           | 74.3 (71.6–77.1)               | 0.0013         |                               |
|                   |      |      |     | AG | 168                | 72.7 (70.2–75.2)               |                |                               | 191              | 73.2 (69.9–76.6)               |                |                               | 359           | 72.9 (70.8–75.1)               |                |                               |
|                   |      |      |     | AA | 79                 | 67.9 (64.6–71.4)               |                |                               | 98               | 66.2 (62.1–70.5)               |                |                               | 177           | 66.9 (64.2–69.8)               |                |                               |
| <i>CYP24A1</i>    |      |      |     |    |                    |                                |                |                               |                  |                                |                |                               |               |                                |                |                               |
| <b>rs6013897</b>  | 20.3 | 0.77 | T/A | TT | 219                | 73.5 (71.3–75.8)               | 0.2887         | 0.5044                        | 264              | 71.8 (69.1–74.7)               | 0.9033         | 0.7058                        | 483           | 72.6 (70.8–74.4)               | 0.4702         |                               |
|                   |      |      |     | AT | 114                | 70.7 (67.8–73.8)               |                |                               | 132              | 70.9 (67.1–74.9)               |                |                               | 246           | 70.8 (68.4–73.4)               |                |                               |
|                   |      |      |     | AA | 11                 | 69.5 (60.7–79.5)               |                |                               | 18               | 70.0 (60.3–81.3)               |                |                               | 29            | 69.8 (63.0–77.4)               |                |                               |
| <b>rs4809960</b>  | 22.7 | 0.35 | T/C | TT | 198                | 72.0 (69.7–74.3)               | 0.8163         | 0.5674                        | 244              | 72.2 (69.3–75.1)               | 0.3402         | 0.2786                        | 442           | 72.1 (70.2–74.0)               | 0.4658         |                               |
|                   |      |      |     | TC | 121                | 72.9 (70.0–76.0)               |                |                               | 152              | 69.7 (66.2–73.3)               |                |                               | 273           | 71.1 (68.7–73.5)               |                |                               |
|                   |      |      |     | CC | 25                 | 73.8 (67.5–80.7)               |                |                               | 18               | 77.2 (66.5–89.6)               |                |                               | 43            | 75.2 (69.1–81.9)               |                |                               |
| <b>rs2296241</b>  | 49.0 | 0.37 | G/A | GG | 90                 | 68.9 (65.8–72.2)               | 0.0301         | 0.1111                        | 103              | 70.3 (66.0–74.8)               | 0.6048         | 0.6078                        | 193           | 69.6 (66.9–72.5)               | 0.0801         |                               |
|                   |      |      |     | AG | 164                | 72.9 (70.4–75.4)               |                |                               | 216              | 71.1 (68.1–74.3)               |                |                               | 380           | 71.9 (69.9–74.0)               |                |                               |
|                   |      |      |     | AA | 90                 | 75.4 (71.9–79.0)               |                |                               | 95               | 73.5 (68.8–78.4)               |                |                               | 185           | 74.4 (71.4–77.5)               |                |                               |
| <b>rs17219315</b> | 3.1  | 0.75 | A/G | AA | 342                | 72.3 (70.6–74.1)               | 0.0895         | 0.1836                        | 401              | 71.4 (69.1–73.7)               | 0.6621         | 0.3828                        | 743           | 71.8 (70.3–73.3)               | 0.3674         |                               |
|                   |      |      |     | AG | 2                  | 95.4 (69.5–130.9)              |                |                               | 13               | 74.3 (62.3–88.6)               |                |                               | 15            | 76.8 (66.5–88.7)               |                |                               |
| <b>rs2426496</b>  | 27.7 | 0.51 | G/T | GG | 176                | 71.3 (68.9–73.8)               | 0.3094         | 0.2500                        | 214              | 70.5 (67.5–73.6)               | 0.6377         | 0.7896                        | 390           | 70.8 (68.9–72.9)               | 0.2573         |                               |
|                   |      |      |     | GT | 135                | 73.2 (70.4–76.0)               |                |                               | 171              | 72.3 (68.9–75.9)               |                |                               | 306           | 72.7 (70.4–75.0)               |                |                               |
|                   |      |      |     | TT | 33                 | 75.8 (70.1–81.9)               |                |                               | 29               | 73.9 (65.7–83.1)               |                |                               | 62            | 74.9 (69.8–80.4)               |                |                               |
| <i>CYP27B1</i>    |      |      |     |    |                    |                                |                |                               |                  |                                |                |                               |               |                                |                |                               |
| <b>rs10877012</b> | 33.5 | 0.02 | G/T | GG | 156                | 72.8 (70.2–75.4)               | 0.1846         | 0.5758                        | 193              | 71.0 (67.9–74.4)               | 0.7822         | 0.9451                        | 349           | 71.8 (69.7–74.0)               | 0.3792         |                               |
|                   |      |      |     | GT | 142                | 73.4 (70.7–76.2)               |                |                               | 163              | 72.4 (68.9–76.0)               |                |                               | 305           | 72.9 (70.6–75.2)               |                |                               |
|                   |      |      |     | TT | 46                 | 68.4 (64.1–73.1)               |                |                               | 57               | 69.9 (64.3–76.0)               |                |                               | 103           | 69.2 (65.5–73.2)               |                |                               |

Table 2. Cont.

| SNP                  | MIMAF | HWE  | M/m   | Gt | Children (n = 344) |                                |                   |                               | Adults (n = 414) |                                |                |                               | All (n = 758) |                                |                   |                               |
|----------------------|-------|------|-------|----|--------------------|--------------------------------|-------------------|-------------------------------|------------------|--------------------------------|----------------|-------------------------------|---------------|--------------------------------|-------------------|-------------------------------|
|                      |       |      |       |    | N                  | 25(OH)D,<br>nmol/L<br>(95% CI) | p <sup>1</sup>    | P <sub>adj</sub> <sup>2</sup> | N                | 25(OH)D,<br>nmol/L<br>(95% CI) | p <sup>1</sup> | P <sub>adj</sub> <sup>2</sup> | N             | 25(OH)D,<br>nmol/L<br>(95% CI) | p <sup>1</sup>    | P <sub>adj</sub> <sup>2</sup> |
| <i>C10orf88</i>      |       |      |       |    |                    |                                |                   |                               |                  |                                |                |                               |               |                                |                   |                               |
| <b>rs6599638</b>     | 47.8  | 0.20 | G/A   | GG | 98                 | 72.5 (69.3–75.8)               | 0.3569            | 0.3197                        | 106              | 72.0 (67.7–76.6)               | 0.8394         | 0.8797                        | 204           | 73.3 (69.5–75.1)               | 0.8349            | 0.8821                        |
|                      |       |      |       | GA | 171                | 73.5 (71.0–76.0)               |                   |                               | 219              | 70.8 (67.8–73.9)               |                |                               | 390           | 71.9 (69.9–74.0)               |                   |                               |
|                      |       |      |       | AA | 75                 | 70.2 (66.6–73.9)               |                   |                               | 88               | 72.2 (67.4–77.2)               |                |                               | 163           | 71.2 (68.2–74.4)               |                   |                               |
| <i>DHCR7/NADSYN1</i> |       |      |       |    |                    |                                |                   |                               |                  |                                |                |                               |               |                                |                   |                               |
| <b>rs1790349</b>     | 15.1  | 0.55 | A/G   | AA | 232                | 71.6 (69.6–73.7)               | <b>0.0174</b>     | 0.0923                        | 300              | 70.9 (68.4–73.6)               | 0.2381         | 0.3478                        | 532           | 71.2 (69.5–73.0)               | 0.3767            | 0.8787                        |
|                      |       |      |       | GA | 105                | 73.2 (70.1–76.4)               |                   |                               | 103              | 73.9 (69.5–78.7)               |                |                               | 208           | 73.6 (70.8–76.5)               |                   |                               |
|                      |       |      |       | GG | 7                  | 91.5 (77.4–108.3)              |                   |                               | 11               | 63.2 (52.2–76.5)               |                |                               | 18            | 73.0 (64.0–83.2)               |                   |                               |
| <b>rs12785878</b>    | 27.5  | 0.84 | T/G   | TT | 171                | 72.8 (70.4–75.4)               | 0.9087            | 0.7649                        | 218              | 73.0 (69.9–76.2)               | 0.4356         | 0.2169                        | 389           | 72.9 (70.9–75.0)               | 0.4273            | 0.0998                        |
|                      |       |      |       | GT | 147                | 72.1 (69.5–74.9)               |                   |                               | 163              | 69.6 (66.2–73.1)               |                |                               | 310           | 70.8 (68.6–73.1)               |                   |                               |
|                      |       |      |       | GG | 26                 | 71.7 (65.7–78.4)               |                   |                               | 32               | 69.9 (62.5–78.2)               |                |                               | 58            | 70.7 (65.7–76.1)               |                   |                               |
| <i>GC</i>            |       |      |       |    |                    |                                |                   |                               |                  |                                |                |                               |               |                                |                   |                               |
| <b>rs16846876</b>    | 33.2  | 0.88 | A/T   | AA | 158                | 76.5 (73.9–79.2)               | <b>&lt;0.0001</b> | <b>0.0004</b>                 | 184              | 74.1 (70.7–77.6)               | <b>0.0161</b>  | <b>0.0024</b>                 | 342           | 75.2 (73.0–77.4)               | <b>&lt;0.0001</b> | <b>&lt;0.0001</b>             |
|                      |       |      |       | AT | 153                | 70.3 (67.8–72.8)               |                   |                               | 185              | 70.9 (67.7–74.3)               |                |                               | 338           | 70.6 (68.5–72.8)               |                   |                               |
|                      |       |      |       | TT | 33                 | 64.5 (59.8–69.6)               |                   |                               | 45               | 63.6 (57.9–69.8)               |                |                               | 78            | 64.0 (60.1–68.1)               |                   |                               |
| <b>rs12512631</b>    | 36.2  | 0.62 | T/C   | TT | 137                | 68.6 (66.1–71.2)               | <b>0.0007</b>     | <b>0.0012</b>                 | 166              | 66.8 (63.6–70.1)               | <b>0.0022</b>  | <b>0.0004</b>                 | 303           | 67.6 (65.5–69.8)               | <b>&lt;0.0001</b> | <b>&lt;0.0001</b>             |
|                      |       |      |       | TC | 157                | 74.4 (71.8–77.1)               |                   |                               | 196              | 74.6 (71.3–78.0)               |                |                               | 353           | 74.5 (72.4–76.7)               |                   |                               |
|                      |       |      |       | CC | 50                 | 77.5 (72.8–82.5)               |                   |                               | 52               | 75.3 (69.0–82.1)               |                |                               | 102           | 76.4 (72.3–80.6)               |                   |                               |
| <b>rs17467825</b>    | 27.6  | 0.53 | A/G   | AA | 181                | 76.3 (73.9–78.8)               | <b>&lt;0.0001</b> | <b>&lt;0.0001</b>             | 219              | 73.8 (70.7–77.0)               | 0.0519         | <b>0.0015</b>                 | 400           | 74.9 (72.9–77.0)               | <b>&lt;0.0001</b> | <b>&lt;0.0001</b>             |
|                      |       |      |       | GA | 142                | 70.1 (67.6–72.7)               |                   |                               | 160              | 70.0 (66.6–73.6)               |                |                               | 302           | 70.1 (67.9–72.3)               |                   |                               |
|                      |       |      |       | GG | 21                 | 57.7 (52.5–63.3)               |                   |                               | 34               | 63.6 (57.1–70.8)               |                |                               | 55            | 61.2 (56.9–65.9)               |                   |                               |
| <b>rs2282679</b>     | 27.4  | 0.41 | A/C   | AA | 181                | 76.3 (73.9–78.8)               | <b>&lt;0.0001</b> | <b>&lt;0.0001</b>             | 219              | 73.8 (70.7–77.0)               | 0.0672         | <b>0.0020</b>                 | 400           | 74.9 (72.9–77.0)               | <b>&lt;0.0001</b> | <b>&lt;0.0001</b>             |
|                      |       |      |       | CA | 138                | 70.0 (66.4–73.6)               |                   |                               | 156              | 70.1 (66.6–73.7)               |                |                               | 294           | 70.0 (67.8–72.3)               |                   |                               |
|                      |       |      |       | CC | 21                 | 57.7 (52.5–63.3)               |                   |                               | 34               | 63.6 (57.1–70.8)               |                |                               | 55            | 61.2 (56.9–65.9)               |                   |                               |
| <b>rs842999</b>      | 4.5   | 0.65 | G/C/A | GG | 105                | 76.7 (73.5–80.0)               | <b>&lt;0.0001</b> | <b>&lt;0.0001</b>             | 112              | 74.2 (70.0–78.7)               | <b>0.0114</b>  | <b>0.0046</b>                 | 217           | 75.4 (72.7–78.3)               | <b>&lt;0.0001</b> | <b>&lt;0.0001</b>             |
|                      |       |      |       | GC | 153                | 72.6 (70.1–75.2)               |                   |                               | 188              | 73.7 (70.4–77.1)               |                |                               | 341           | 73.2 (71.1–75.4)               |                   |                               |
|                      |       |      |       | CC | 57                 | 63.7 (60.2–67.5)               |                   |                               | 75               | 66.6 (61.9–71.5)               |                |                               | 132           | 65.3 (62.3–68.5)               |                   |                               |
|                      |       |      |       | GA | 19                 | 74.3 (67.3–82.1)               |                   |                               | 23               | 64.9 (57.0–73.9)               |                |                               | 42            | 69.0 (63.4–75.1)               |                   |                               |
|                      |       |      |       | CA | 7                  | 76.3 (64.6–89.6)               |                   |                               | 12               | 55.8 (46.6–66.9)               |                |                               | 19            | 62.6 (55.2–71.0)               |                   |                               |
|                      |       |      |       | AA | 0                  | -                              |                   |                               | 1                | 75.5 (40.5–140.9)              |                |                               | 1             | 75.5 (43.6–130.8)              |                   |                               |
| <b>rs4588</b>        | 27.7  | 0.57 | C/A   | CC | 181                | 76.3 (73.9–78.8)               | <b>&lt;0.0001</b> | <b>&lt;0.0001</b>             | 219              | 74.1 (71.0–77.3)               | <b>0.0167</b>  | <b>0.0008</b>                 | 400           | 75.1 (73.1–77.2)               | <b>&lt;0.0001</b> | <b>&lt;0.0001</b>             |
|                      |       |      |       | CA | 142                | 70.1 (67.6–72.7)               |                   |                               | 161              | 69.7 (66.3–73.2)               |                |                               | 303           | 69.9 (67.7–72.1)               |                   |                               |

Table 2. Cont.

| SNP               | MMAF | HWE  | M/m | Gt | Children (n = 344) |                    |                |                               | Adults (n = 414) |                    |                |                               | All (n = 758) |                    |                |                               |  |  |               |
|-------------------|------|------|-----|----|--------------------|--------------------|----------------|-------------------------------|------------------|--------------------|----------------|-------------------------------|---------------|--------------------|----------------|-------------------------------|--|--|---------------|
|                   |      |      |     |    | N                  | 25(OH)D,<br>nmol/L | p <sup>1</sup> | P <sub>adj</sub> <sup>2</sup> | N                | 25(OH)D,<br>nmol/L | p <sup>1</sup> | P <sub>adj</sub> <sup>2</sup> | N             | 25(OH)D,<br>nmol/L | p <sup>1</sup> | P <sub>adj</sub> <sup>2</sup> |  |  |               |
|                   |      |      |     |    |                    | (95% CI)           |                |                               |                  |                    | (95% CI)       |                               |               |                    |                | (95% CI)                      |  |  |               |
| <b>rs222020</b>   | 15.6 | 0.13 | T/C | AA | 21                 | 57.7 (52.5–63.3)   |                |                               | 34               | 63.6 (57.1–70.8)   |                |                               | 55            | 61.2 (56.9–65.9)   |                |                               |  |  |               |
|                   |      |      |     | TT | 250                | 70.5 (68.6–72.5)   | <b>0.0009</b>  | <b>0.0021</b>                 | 291              | 70.5 (67.9–73.1)   | <b>0.1954</b>  | <b>0.5338</b>                 | 541           | 70.5 (68.8–72.2)   | <b>0.0103</b>  |                               |  |  | 0.0739        |
|                   |      |      |     | TC | 88                 | 78.4 (74.8–82.1)   |                |                               | 117              | 73.2 (69.1–77.6)   |                |                               | 205           | 75.4 (72.5–78.4)   |                |                               |  |  |               |
| <b>rs2298849</b>  | 20.2 | 0.57 | T/C | CC | 6                  | 69.7 (58.3–83.5)   |                |                               | 6                | 86.4 (66.7–111.8)  |                |                               | 12            | 77.6 (66.1–91.1)   |                |                               |  |  | 0.2605        |
|                   |      |      |     | TT | 229                | 71.1 (69.1–73.2)   | <b>0.0170</b>  | <b>0.2204</b>                 | 262              | 70.3 (67.6–73.1)   | 0.4399         | 0.4591                        | 491           | 70.7 (69.0–72.5)   | <b>0.0390</b>  |                               |  |  |               |
|                   |      |      |     | CT | 99                 | 75.4 (72.1–78.8)   |                |                               | 137              | 73.4 (69.5–77.5)   |                |                               | 236           | 74.2 (71.6–77.0)   |                |                               |  |  |               |
|                   |      |      |     | CC | 15                 | 71.1 (63.4–79.7)   |                |                               | 15               | 73.3 (62.3–86.3)   |                |                               | 30            | 72.2 (65.2–79.9)   |                |                               |  |  |               |
| <i>VDR</i>        |      |      |     |    |                    |                    |                |                               |                  |                    |                |                               |               |                    |                |                               |  |  |               |
| <b>rs731236</b>   | 40.3 | 0.18 | T/C | TT | 113                | 70.0 (67.1–73.0)   | 0.1929         | 0.0753                        | 154              | 68.9 (65.4–72.5)   | 0.1499         | 0.1306                        | 267           | 69.3 (67.0–71.7)   | 0.0753         |                               |  |  | <b>0.0346</b> |
|                   |      |      |     | TC | 181                | 74.2 (71.8–76.7)   |                |                               | 186              | 72.3 (69.0–75.7)   |                |                               | 367           | 73.2 (71.1–75.4)   |                |                               |  |  |               |
|                   |      |      |     | CC | 49                 | 72.0 (67.5–76.7)   |                |                               | 74               | 74.9 (69.6–80.6)   |                |                               | 123           | 73.7 (70.1–77.5)   |                |                               |  |  |               |
| <b>rs757343</b>   | 11.5 | 0.45 | G/A | GG | 261                | 73.9 (71.9–76.0)   | <b>0.0134</b>  | <b>0.0103</b>                 | 326              | 72.2 (69.7–74.7)   | 0.2350         | 0.0896                        | 587           | 72.9 (71.3–74.6)   | <b>0.0144</b>  |                               |  |  | <b>0.0025</b> |
|                   |      |      |     | AG | 77                 | 68.4 (65.1–72.0)   |                |                               | 81               | 69.6 (64.9–74.7)   |                |                               | 158           | 69.1 (66.1–72.2)   |                |                               |  |  |               |
|                   |      |      |     | AA | 6                  | 63.7 (53.1–76.3)   |                |                               | 7                | 59.9 (47.1–76.0)   |                |                               | 13            | 61.6 (52.8–71.9)   |                |                               |  |  |               |
| <b>rs10783219</b> | 36.4 | 0.10 | A/T | AA | 147                | 72.5 (69.8–75.2)   | 0.9862         | 0.7067                        | 160              | 70.1 (66.7–73.7)   | 0.4908         | 0.3913                        | 307           | 71.2 (69.0–73.5)   | 0.6600         |                               |  |  | 0.2023        |
|                   |      |      |     | TA | 152                | 72.6 (70.0–75.2)   |                |                               | 207              | 71.8 (68.7–75.0)   |                |                               | 359           | 72.1 (70.0–74.3)   |                |                               |  |  |               |
|                   |      |      |     | TT | 45                 | 72.1 (67.4–77.1)   |                |                               | 47               | 74.6 (68.0–81.8)   |                |                               | 92            | 73.4 (69.2–77.8)   |                |                               |  |  |               |
| <b>rs7139166</b>  | 43.0 | 0.48 | C/G | CC | 114                | 72.4 (69.5–75.5)   | 0.6063         | 0.4251                        | 131              | 73.2 (69.2–77.3)   | 0.2755         | 0.4324                        | 245           | 72.8 (70.3–75.5)   | 0.8342         |                               |  |  | 0.7845        |
|                   |      |      |     | CG | 167                | 71.6 (69.2–74.1)   |                |                               | 210              | 71.7 (68.6–74.8)   |                |                               | 377           | 71.6 (69.6–73.7)   |                |                               |  |  |               |
|                   |      |      |     | GG | 62                 | 74.9 (70.8–79.3)   |                |                               | 73               | 67.9 (63.0–73.1)   |                |                               | 135           | 71.0 (67.7–74.5)   |                |                               |  |  |               |

Bold numbers represent significant P values.

SNP single nucleotide polymorphism (ordered by position), MAF minor allele frequency for the adult population in percent, HWE P-values for Hardy-Weinberg equilibrium in the adult population, M/m major and minor alleles, Gt genotype, Mean, raw serum 25(OH)D concentrations were log-transformed to approximate a normal distribution as given as geometric mean (nmol/L), 95% CI 95%-confidence interval.

<sup>1</sup>Unadjusted P values.

<sup>2</sup>Adjusted P values. Linear mixed models with family as a random factor, adjusted for age, sex, BMI, ski and sun holidays, use of solarium, dietary vitamin D intake, use of multivitamin and vitamin D supplementation.

doi:10.1371/journal.pone.0089907.t002

**Table 3.** Distribution of CYP2R1 haplotype combinations and serum 25(OH)D concentrations in children, adults and all combined.

| Haplotype-combination | Children (n = 348)   |          |                      |          |                      |                   | Adults (n = 413)     |           |                      |                  |                      |           | All (n = 761)        |                  |                      |           |                      |                  |
|-----------------------|----------------------|----------|----------------------|----------|----------------------|-------------------|----------------------|-----------|----------------------|------------------|----------------------|-----------|----------------------|------------------|----------------------|-----------|----------------------|------------------|
|                       | rs1074<br>1657       |          | rs1076<br>6197       |          | Alleles <sup>1</sup> |                   | Raw mean             | Adj. Mean | N                    | P <sub>adj</sub> | Raw mean             | Adj. Mean | N                    | P <sub>adj</sub> | Raw mean             | Adj. Mean | N                    | P <sub>adj</sub> |
|                       | 25(OH)D <sup>2</sup> | (95% CI) | 25(OH)D <sup>2</sup> | (95% CI) | 25(OH)D <sup>3</sup> | (95% CI)          | 25(OH)D <sup>2</sup> | (95% CI)  | 25(OH)D <sup>2</sup> | (95% CI)         | 25(OH)D <sup>2</sup> | (95% CI)  | 25(OH)D <sup>2</sup> | (95% CI)         | 25(OH)D <sup>2</sup> | (95% CI)  | 25(OH)D <sup>2</sup> | (95% CI)         |
| 11                    | GG                   | AA       | Mm                   | 65       | 67.3 (63.8–71.1)     | 64.9 (46.8–89.9)  | <b>0.0059</b>        | 81        | 65.7 (61.3–70.4)     | 65.2 (52.5–81.1) | <b>0.0450</b>        | 146       | 66.4 (63.4–69.5)     | 67.9 (56.0–82.2) | <b>0.0007</b>        |           |                      |                  |
| 22                    | AA                   | GG       | mM                   | 39       | 80.6 (75.2–86.4)     | 78.7 (56.9–108.9) |                      | 57        | 74.3 (68.4–80.8)     | 74.6 (59.2–94.0) |                      | 96        | 76.8 (72.7–81.3)     | 78.2 (64.5–94.8) |                      |           |                      |                  |
| 33                    | GG                   | GG       | MM                   | 8        | 68.6 (58.9–80.0)     | 63.7 (43.7–92.8)  |                      | 13        | 70.5 (59.3–83.8)     | 66.4 (50.4–87.6) |                      | 21        | 69.8 (61.9–78.6)     | 68.0 (54.5–85.0) |                      |           |                      |                  |
| 44                    | AA                   | AA       | mm                   | 1        | 50.9 (33.0–78.6)     | -                 |                      | 1         | 79.2 (42.4–147.9)    | -                |                      | 2         | 63.5 (43.1–93.5)     | -                |                      |           |                      |                  |
| 12*                   | GA                   | AG       |                      | 112      | 74.2 (71.2–77.3)     |                   |                      | 119       | 75.5 (71.3–80.0)     |                  |                      | 231       | 74.8 (72.2–77.6)     |                  |                      |           |                      |                  |
| 13                    | GG                   | AG       |                      | 47       | 68.5 (64.3–73.1)     |                   |                      | 56        | 67.2 (61.8–73.0)     |                  |                      | 103       | 67.8 (64.2–71.6)     |                  |                      |           |                      |                  |
| 23                    | GA                   | GG       |                      | 50       | 73.8 (69.4–78.5)     |                   |                      | 54        | 72.3 (66.4–78.7)     |                  |                      | 104       | 73.0 (69.2–77.0)     |                  |                      |           |                      |                  |
| 14                    | GA                   | AA       |                      | 15       | 72.1 (64.2–81.0)     |                   |                      | 16        | 68.0 (58.2–79.5)     |                  |                      | 31        | 69.9 (63.3–77.3)     |                  |                      |           |                      |                  |
| 24                    | AA                   | AG       |                      | 11       | 75.5 (66.2–86.1)     |                   |                      | 16        | 78.2 (66.9–91.4)     |                  |                      | 27        | 77.1 (69.4–85.6)     |                  |                      |           |                      |                  |

Bold numbers represent significant P values.

Haplotype combinations were manually inferred and numbered. Homozygote haplotype combinations were numbered 11, 22, 33 and 44. The combinations of the heterozygote haplotypes (12 to 24) were given by one number of each homozygote haplotype e.g. 11+22 = 12.

\* Also haplotype combination 34, but the most likely haplotype combination is 12.

<sup>1</sup>M major allele, m minor allele.

<sup>2</sup>Raw geometric mean of serum 25(OH)D concentrations (nmol/L) and corresponding 95%-confidence interval.

<sup>3</sup>Adjusted geometric mean of 25(OH)D concentrations (nmol/L) and corresponding 95%-confidence interval. Linear mixed models with family as a random factor, adjusted for age, sex, BMI, ski and sun holidays, use of solarium, dietary vitamin D intake, use of multivitamin and vitamin D supplements.

<sup>adj</sup>Adjusted P values. Haplotype combination 44 was excluded in the linear mixed model due to inadequate participants carrying this haplotype combination.

doi:10.1371/journal.pone.0089907.t003

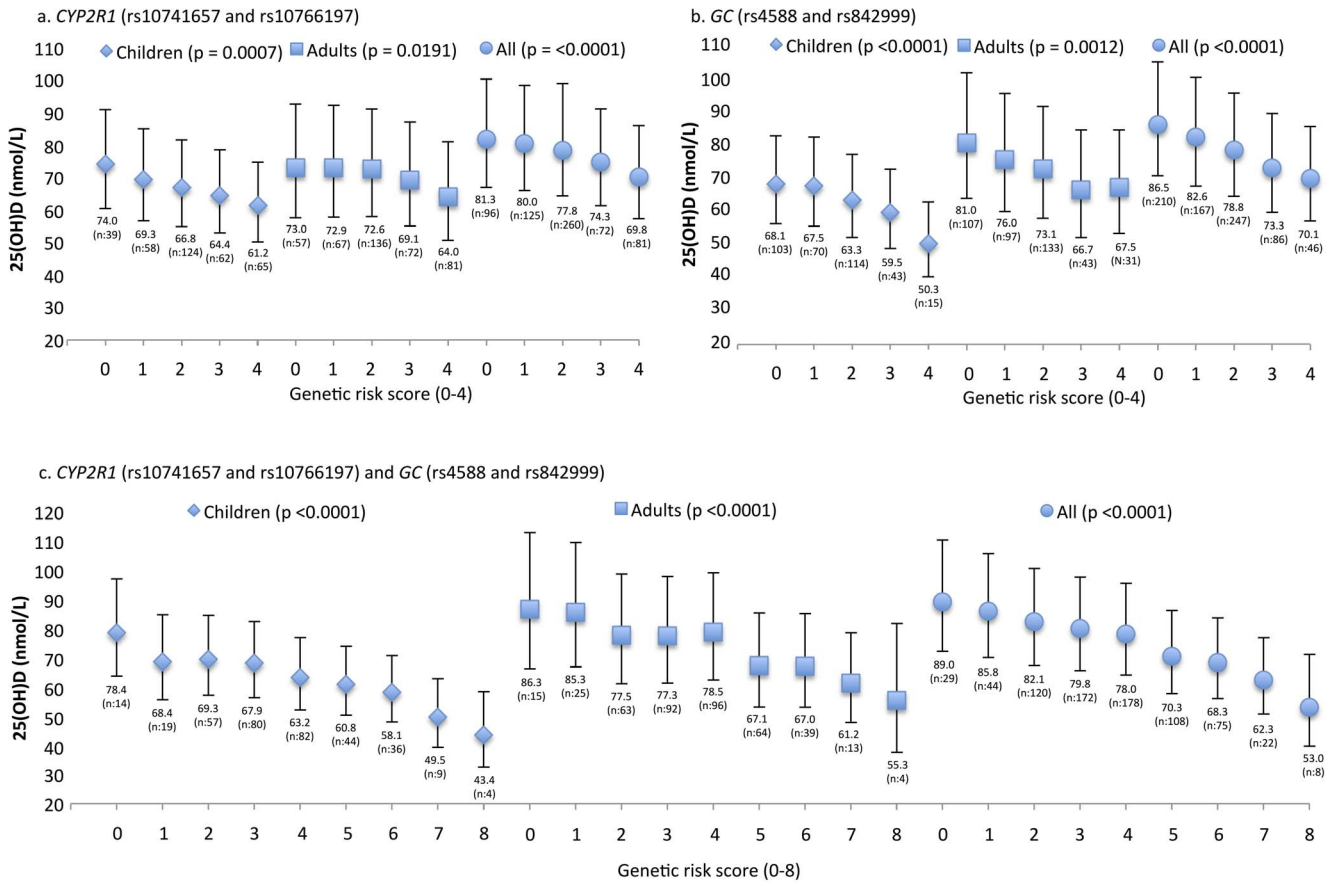

**Figure 1. Genetic risk score for CYP2R1 (rs10741657 and rs10766197) (Figure A), GC (rs4588 and rs842999) (figure B) and CYP2R1 (rs10741657 and rs10766197) and GC (rs4588 and rs842999) (figure C) in children, adults and all combined.** X-axis stands for the sum of risk alleles. Y-axis stand for serum 25(OH)D (nmol/L). Errors bars stand for 95%-confidence interval and serum 25(OH)D concentrations are given as geometric means. Linear mixed models with family as a random factor, adjusted for age, sex, BMI, ski and sun holidays, solarium use at least once a week, dietary vitamin D intake, multivitamin and vitamin D supplement users was conducted to compare sum of risk alleles and serum 25(OH)D concentrations. Increasing number of risk alleles give rise to decreasing 25(OH)D concentrations. doi:10.1371/journal.pone.0089907.g001

the other SNPs, family and confounding factors in a linear mixed model. The strongest association was observed for rs4588 (p = 0.0099) compared to rs2282679 (p = 0.0230), rs17467825 (p = 0.0230) and rs16846876 (p = 0.5669, data not shown). Further analyses only included rs4588. None of the other GC-variants were in LD.

The three significant GC-variants (rs4588, rs842999, and rs12512631) formed five haplotypes, where haplotype 1 and 2 were the most frequent (Table 4). The combinations of the five haplotypes are shown in table 4. The five haplotypes could explain 723 of the 762 (95%) observed genotype combinations in GC (data not shown). The association between haplotype combinations and serum 25(OH)D concentrations was statistically significant in children (p = 0.0344), and all combined (p = 0.0018) but not in adults (p = 0.1541).

Carriers of haplotype combination 22 encompassing the variant alleles of rs4588 and rs842999 had low serum 25(OH)D concentrations. Conversely, carriers of haplotype combination 11 encompassing the variant allele of rs12512631 had high serum 25(OH)D concentration. Thus, the variant allele of rs12512631 was associated with high low serum 25(OH)D concentrations and the variant alleles of rs4588 and rs842999 were associated with low serum 25(OH)D concentrations. Since the lowest serum 25(OH)D concentrations were observed for haplotype combination 22

carriers, this could indicate that rs4588 is the biologically relevant polymorphism rather than rs842999 since haplotype combination 44 encompassing the C-allele of rs842999 is associated with higher serum 25(OH)D concentrations.

The genetic risk score (range 0–4) was calculated as the sum of the number of A-alleles of rs4588 and C/A-alleles of rs842999 (Figure 1, B). After adjustment for family and confounding factors, we found that an increasing number of risk alleles was associated with lower serum 25(OH)D concentrations. Carriers of no risk alleles had significantly higher serum 25(OH)D concentrations (68.1 (56.2–82.6), 81.0 (64.2–102.2) and 86.5 (70.9–105.5) nmol/L) compared to carriers of all four risk alleles (50.3 (40.3–62.7), 67.5 (53.6–84.9) and 70.1 (57.2–84.8) nmol/L) in both children, adults and all combined, respectively. Overall, there was a mean difference in 25(OH)D concentrations of 35.4, 20.0 and 23.4% between carrying no risk alleles and carrying all four risk alleles in children, adults and all combined, respectively.

For the tri-allelic variant rs842999, there was a dose-dependent relationship between serum 25(OH)D concentrations and carriage of none, one or two copies of the G-allele (Figure 2). Thus, carriers of two copies of the G-allele, had statistically significantly higher serum 25(OH)D concentrations (69.2 (56.8–84.3), 79.0 (62.8–99.4) and 84.8 (69.6–103.4) nmol/L) compared to carriers of only one G-allele (65.6 (53.9–79.9), 73.7 (58.8–92.4) and 79.0 (64.9–96.1)



**Table 4.** Distribution of GC haplotype combinations and serum 25(OH)D concentrations in children, adults and all combined.

| Haplotype-combination | Children (n = 215) |              |        | Adults (n = 262)     |     |                                              | All (n = 488)                                 |                   |               |                                              |                                               |                   |        |                   |                   |                   |
|-----------------------|--------------------|--------------|--------|----------------------|-----|----------------------------------------------|-----------------------------------------------|-------------------|---------------|----------------------------------------------|-----------------------------------------------|-------------------|--------|-------------------|-------------------|-------------------|
|                       | rs1251<br>2631     | rs84<br>2999 | rs4588 | Alleles <sup>1</sup> | N   | Raw mean<br>25(OH)D <sup>2</sup><br>(95% CI) | Adj. Mean<br>25(OH)D <sup>3</sup><br>(95% CI) | P <sub>adj</sub>  | N             | Raw mean<br>25(OH)D <sup>2</sup><br>(95% CI) | Adj. Mean<br>25(OH)D <sup>3</sup><br>(95% CI) | P <sub>adj</sub>  |        |                   |                   |                   |
|                       | 11                 | CC           | GG     | CC                   | mMM | 48                                           | 78.0 (73.3–82.9)                              | 86.3 (65.7–106.3) | <b>0.0344</b> | 49                                           | 75.6 (69.4–82.5)                              | 71.8 (48.3–106.8) | 0.1541 | 97                | 76.8 (72.7–81.1)  | 88.3 (63.3–123.1) |
| 22                    | TT                 | CC           | AA     | Mmm                  | 15  | 56.1 (50.3–62.5)                             | 61.6 (47.1–80.7)                              |                   | 31            | 65.9 (59.2–73.5)                             | 58.2 (40.8–82.9)                              |                   | 46     | 62.5 (57.8–67.7)  | 69.3 (50.3–95.4)  |                   |
| 33                    | TT                 | GG           | CC     | MMM                  | 7   | 69.2 (59.0–81.2)                             | 74.4 (56.9–97.2)                              |                   | 14            | 69.7 (59.3–82.0)                             | 64.6 (41.8–99.7)                              |                   | 21     | 69.6 (61.9–78.2)  | 79.8 (56.0–113.9) |                   |
| 44                    | TT                 | CC           | CC     | MmM                  | 8   | 68.9 (59.4–80.0)                             | 69.7 (53.0–91.8)                              |                   | 9             | 74.9 (61.2–91.7)                             | 66.3 (40.6–108.3)                             |                   | 17     | 72.0 (63.2–82.1)  | 78.6 (54.7–113.1) |                   |
| 55                    | TT                 | AA           | CC     | MmM                  | 0   | –                                            | –                                             |                   | 1             | 75.5 (41.2–138.3)                            | –                                             |                   | 1      | 75.5 (44.1–129.3) | –                 |                   |
| 12                    | TC                 | GC           | CA     |                      | 65  | 71.9 (68.2–75.7)                             |                                               |                   | 77            | 74.2 (69.3–79.5)                             |                                               |                   | 142    | 73.1 (69.9–76.5)  |                   |                   |
| 13                    | TC                 | GG           | CC     |                      | 48  | 76.7 (72.1–81.5)                             |                                               |                   | 44            | 77.5 (70.7–84.9)                             |                                               |                   | 92     | 77.1 (72.8–81.5)  |                   |                   |
| 14                    | TC                 | GC           | CC     |                      | 30  | 78.0 (72.3–84.3)                             |                                               |                   | 51            | 79.3 (72.9–86.3)                             |                                               |                   | 81     | 78.8 (74.3–83.7)  |                   |                   |
| 23                    | TT                 | GC           | CA     |                      | 34  | 70.3 (65.4–75.6)                             |                                               |                   | 39            | 69.6 (63.2–76.7)                             |                                               |                   | 73     | 69.9 (65.7–74.5)  |                   |                   |
| 42                    | TT                 | CC           | CA     |                      | 33  | 66.4 (61.6–71.5)                             |                                               |                   | 32            | 66.6 (59.8–74.1)                             |                                               |                   | 65     | 66.5 (62.2–71.1)  |                   |                   |
| 15                    | TC                 | GA           | CC     |                      | 11  | 70.0 (61.6–79.4)                             |                                               |                   | 16            | 67.0 (57.6–77.9)                             |                                               |                   | 27     | 68.2 (61.5–75.6)  |                   |                   |
| 34                    | TT                 | GC           | CC     |                      | 15  | 76.1 (68.3–84.8)                             |                                               |                   | 16            | 72.9 (62.6–84.8)                             |                                               |                   | 31     | 74.4 (67.6–82.0)  |                   |                   |
| 35                    | TT                 | GA           | CC     |                      | 8   | 80.7 (69.5–93.7)                             |                                               |                   | 7             | 60.4 (48.0–75.9)                             |                                               |                   | 15     | 70.5 (61.3–81.0)  |                   |                   |
| 45                    | TT                 | CA           | CC     |                      | 5   | 77.9 (64.6–94.1)                             |                                               |                   | 6             | 52.9 (41.4–67.8)                             |                                               |                   | 11     | 63.1 (53.7–74.2)  |                   |                   |
| 25                    | TT                 | CA           | CA     |                      | 2   | 71.7 (53.2–96.6)                             |                                               |                   | 6             | 58.9 (46.0–75.4)                             |                                               |                   | 8      | 61.9 (51.1–74.8)  |                   |                   |

Bold numbers represent significant P values.

Haplotype combinations were manually inferred and numbered. Homozygote haplotype combinations were numbered 11, 22, 33, 44 and 55. The combinations of the heterozygote haplotypes (12 to 45) were given by one number of each homozygote haplotype e.g. 1 + 2 = 12.

<sup>1</sup>M major allele, m minor allele.

<sup>2</sup>Raw geometric mean of serum 25(OH)D concentrations (nmol/L) and corresponding 95%-confidence interval.

<sup>3</sup>Adjusted geometric mean of 25(OH)D concentrations (nmol/L) and corresponding 95%-confidence interval. Linear mixed models with family as a random factor, adjusted for age, sex, BMI, holiday, use of solarium, dietary vitamin D intake, use of multivitamin and vitamin D supplements.

<sup>adj</sup>Adjusted P values. Haplotype combination 44 was excluded in the linear mixed model due to inadequate participants carrying this haplotype combination.

doi:10.1371/journal.pone.0089907.t004

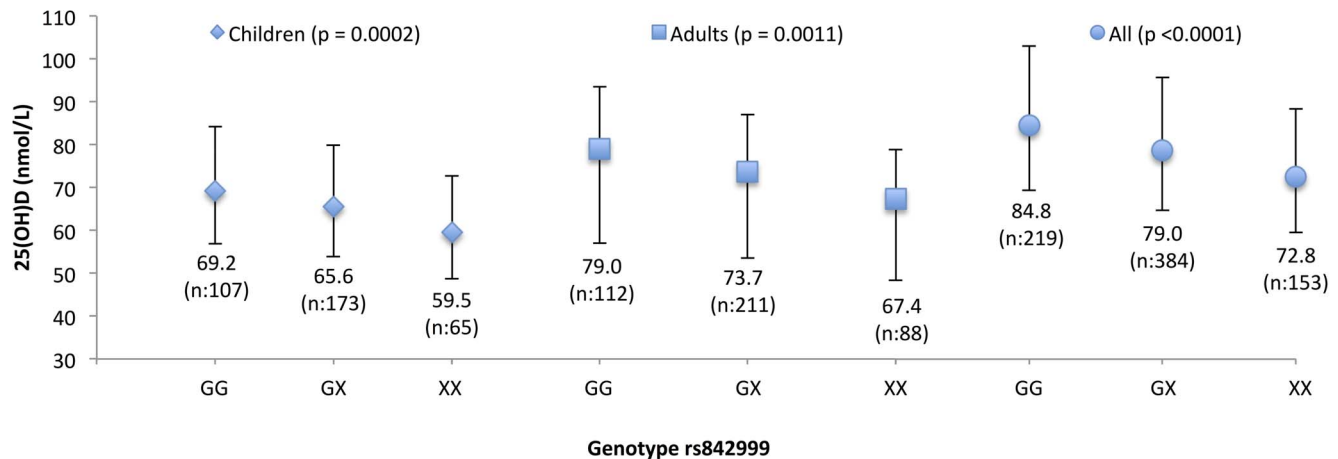

**Figure 2. Dose-dependent relationship between genotype GG, GX and XX of rs842999 and serum 25(OH)D concentrations.** X-axis stands for genotype GG (GG), GX (GC or GA) and XX (CC, CA or AA) of rs842999. Y-axis stand for serum 25(OH)D (nmol/L). Errors bars stand for 95%-confidence interval and serum 25(OH)D concentrations are given as geometric means. Linear mixed models with family as a random factor, adjusted for age, sex, BMI, ski and sun holidays, solarium use at least once a week, dietary vitamin D intake, multivitamin and vitamin D supplement users was conducted to compare rs842999 genotypes with serum 25(OH)D concentrations. There was a dose-dependent relationship between serum 25(OH)D concentrations and carriers of none, one or two copies of the G-allele. Carriers of two copies of the G-allele, had higher serum 25(OH)D concentrations compared to carriers with only one G-allele or non-carriers in children, adults and all combined, respectively. doi:10.1371/journal.pone.0089907.g002

nmol/L) in children, adults and all combined, respectively. The lowest serum 25(OH)D concentrations were observed in non-carriers of the G-allele (59.5 (48.7–72.6), 67.4 (53.8–84.4) and 72.8 (59.7–88.8) nmol/L) in both children, adults and all combined, respectively.

Finally, we made a joint genetic risk score analysis including *CYP2R1* (rs10741657 and rs10766197) and *GC* (rs4588 and rs842999) (Figure 1, C). The genetic risk score (range 0–8) was calculated as the sum of the number of G-alleles of rs10741657, A-alleles of rs10766197, A-alleles of rs4588 and C/A-alleles of rs842999 (Figure 1, C). After adjustment for family and confounding factors, carriers of no risk alleles had statistically significantly higher 25(OH)D concentrations (78.4 (63.6–96.7), 86.3 (66.1–112.7) and 89.0 (72.0–110.0) nmol/L) compared to carriers of all eight risk alleles 43.4 (32.4–58.2), 55.3 (37.5–81.4) and 53.0 (39.6–70.9) nmol/L) in children, adults and all combined, respectively. Overall there was a mean difference in 25(OH)D concentrations of 80.6, 56.1 and 67.9% between carriage of no risk alleles and carriage of all four risk alleles in children, adults and all combined, respectively.

## Discussion

In this present study, we studied the association of 7 prominent vitamin D-related genes with serum 25(OH)D concentrations in 201 Danish families with dependent children in late summer in Denmark, and found that common variants in *CYP2R1* and *GC* genes were statistically significantly associated with serum 25(OH)D concentrations.

The *CYP2R1* gene encodes the key enzyme that converts vitamin D to 25(OH)D in the liver [12] and thus genetic variation in this gene might affect 25(OH)D synthesis. We found that *CYP2R1* variants rs1562902, rs7116978, rs10741657 and rs10766197, were significantly associated with serum 25(OH)D concentrations in both children, adults and all combined. Furthermore, rs10741657-rs7116978, and rs10766197-rs1562902 were in strong LD. The association appeared to be driven by rs10741657 and rs10766197, which are located in the promoter region of the *CYP2R1* gene. We found that non-carriers of

rs10741657 and rs10766197 risk alleles had the highest mean serum 25(OH)D concentrations.

Our results are consistent with previous findings. In the study of Wjst et al. [21], rs10766197 was significantly associated with 25(OH)D concentrations in 872 subjects from the German Asthma Family Study. Ramos-Lopez et al. [32] found a statistically significant association between rs10741657 and serum 25(OH)D concentrations in 203 German diabetes families. Two genome-wide association studies (GWAS) of vitamin D concentrations were published in 2010 [24,25]. Ahn et al. [24] performed a combined meta-analysis in 4,501 subjects from five adult Caucasian cohorts and found that rs2060793, which is in LD with rs10741657 ( $D = 1$ ,  $r^2 = 1$ , HapMap Data Rel 24/phase II Nov 08), was associated with serum 25(OH)D concentrations. Furthermore, these findings were successfully replicated in 2,221 subjects. Wang et al. [25] found that rs10741657 was significantly associated with 25(OH)D concentrations in 30,000 subjects of European descent from 15 cohorts. In the study of Bu et al. [33], rs10741657 and rs10766197 were found to be significantly associated with serum 25(OH)D concentrations in 496 unrelated healthy Caucasian subjects. Lasky-Su et al. [34] conducted a combined analysis in 1,164 subjects from two cohorts of Caucasian and Costa Rica asthmatic children and found that rs10741657 was significantly associated with 25(OH)D concentrations. Zhang et al. [35] found that rs10766197 was significantly associated with 25(OH)D concentrations in 2,897 unrelated healthy Chinese subjects from the Shanghai Osteoporosis Study. In the study of Engelman et al. [36], rs2060793 (in LD with rs10741657 as mentioned previously) was significantly associated with 25(OH)D concentrations in 1,204 women of European descent from the Women's Health Initiative Observational Study. All the aforementioned studies demonstrate that variants in the *CYP2R1* gene predicts 25(OH)D concentrations.

The *GC* gene encodes the vitamin D binding protein (DBP) that binds and transports blood 25(OH)D and other vitamin D metabolites to their target organs. Less than 0.04% of blood 25(OH)D circulates in free form (bioavailable). Most is bound with high affinity to DBP (83–85%) and with lower affinity to albumin

(12–15%) [37]. Variants in the *GC* gene may affect the DBP binding and bioavailability of 25(OH)D and other vitamin D metabolites. Thus, there may be a relationship between phenotype and blood 25(OH)D concentrations.

There is accumulating evidence that variants in the *GC* gene are associated with 25(OH)D concentrations. The most studied *GC*-variants are rs4588 and rs7041, giving three common *GC*-isoforms, *GC1F* (rs7041-T, rs4588-C), *GC1S* (rs7041-G, rs4588-C), and *GC2* (rs7041-T, rs4588-A), which differ by amino acid substitutions and/or by glycosylation (Gozdzik et al. 2011). Several studies have shown that vitamin D status differs significantly depending on rs4588 and/or rs7041 genotype, where the A-allele of rs4588 and the T-allele of rs7041 are consistently associated with lower 25(OH)D concentrations [17,38–45]. In agreement, we found that the A-allele of rs4588 is associated with lower 25(OH)D concentrations. There is biological support that the affinity of both 25(OH)D and 1,25(OH)<sub>2</sub>D is higher for the C-allele of rs4588 than for the A-allele [46]. Based on glycosylation patterns, it is suggested that *GC2* phenotypes that is associated with low vitamin D concentrations should be metabolized faster. Kawakami et al. observed that the metabolic rate was indeed higher in *GC2-2* individuals than in *GC1-1* individuals [47]. In addition, the *GC2* genotype, which is associated with low 25(OH)D concentrations, is also associated with low mean DBP [43]. Strangely, the *GC2* genotype is more frequent in populations living in northern climates [48].

Since the two GWAS studies [24,25] found a strong association between rs2282679 and 25(OH)D concentrations, there has been increased focus on this polymorphism. Several studies have been published supporting the finding [22,34,35,49–51]. The GWAS *GC* variant rs2282679 is in high LD with rs4588. Wang et al. [25] did not include rs4588 because it is not in the HapMap dataset. In one study sample the authors found that rs4588 was in LD with several associated variants from the GWAS study. In the study of Lu et al. [45], rs4588 and rs2282679 ( $r^2 = 0.97$ ) were significantly associated with 25(OH)D concentrations in 3,210 Han Chinese. In the study by Berry et al. [52], rs4588 was in strong LD with rs228697 ( $r^2 = 0.98$ ), and rs4588 was significantly associated with 25(OH)D concentrations in 6,551 subjects from the British birth cohort. Zhang et al. [35] found that 2282679 and rs4588 were in strong LD in 2,897 unrelated healthy Chinese subjects and the strongest association was observed for rs4588, which accounted for 0.7% of the variation in serum 25(OH)D concentrations. Our results support that rs228697 is in strong LD with rs4588 (Pearson's  $r = 0.997$ , SNAP proxy  $D' = 1$   $r^2 = 0.98$ ) and that the association with serum 25(OH)D concentrations is most likely driven by rs4588. Zhang et al. [35] argued that it is unlikely that rs2282679 in itself is the disease-causing variant. The possible causal variant is the non-synonymous rs4588, where the C/A base pair change in codon 436 (previously known as 420 [36]) causes a Thr to Lys amino acid substitution. In agreement with Zhang et al. [35] we found that rs4588 was the strongest independent predictor of 25(OH)D concentrations compared to rs2282679. Furthermore, Zang et al [35] found that both the minor T-allele of rs4588 and G- allele of rs2282679 were associated with reduced DBP concentrations. Participants with 3 or 4 risk alleles of the two variants were more likely to have vitamin D concentrations lower than 50 nmol/L (20 ng/mL) compared with non-carriers of the risk alleles.

In our study, several of the significant *GC* variants were in strong LD and the strongest associations with serum 25(OH)D concentrations were observed for rs4588 and rs842999. We observed a dose-dependent relationship between carrying none, one or two copies of the G-allele of the tri-allelic rs842999 and 25(OH)D

concentrations. Furthermore, genetic risk score analysis for rs4588 and rs842999 showed that non-carriers of the risk alleles of rs4588 and rs842999 had the highest serum 25(OH)D concentrations.

We made a joint genetic risk score analysis for all four risk variants (*CYP2R1*-rs10741657 and rs10766197, and *GC*-rs4588 and rs842999), and found the largest%-range in mean serum 25(OH)D concentrations (80.6, 56.1 and 67.9%) compared to genetic risk score analysis of *CYP2R1* (rs10741657 and rs10766197; 20.9, 14.1 and 16.5%) or *GC* (rs4588 and rs842999; 35.4, 20.0 and 23.4%) indicating an additive effect. In general, there was a better association between genetic risk score and serum 25(OH)D concentrations in children than in adults. We speculate that the more risk alleles in *CYP2R1* and *GC* genes a subject carries, the more prone the subject will be for having a low serum 25(OH)D concentration. In Denmark, sufficient serum 25(OH)D concentrations are defined as >50 nmol/L [53]. Notably, in late summer in Denmark, where vitamin D status peaks in Danes, children carrying 7 or 8 risk alleles had insufficient serum 25(OH)D concentrations (49.4 and 43.4 nmol/L).

In our study population, none of the investigated SNPs in *CYP24A1*, *CYP27B1*, *C10orf88* or *DHCR7/NADSYN1* were associated with serum 25(OH)D concentrations. Furthermore, *VDR*-rs731236 was only statistically significant in all combined and rs757343 was statistically significant in children and all combined. False-positive (type 1 errors) results, which are common in studies of the association between genetic markers and outcomes, and the relative small sample size, resulting in statistical reduced power might explain these findings. We consider children and adults as two natural subpopulations due to biological differences, difference in lifestyle, eating patterns and use of multivitamins [28]. We did not use Bonferroni-corrected P-values because a statistically significant association both in children and in adults by itself may be considered a confirmation of an association. A limitation of the study is that the participants' general vitamin D status relies on a single measurement of serum 25(OH)D concentration. We were not able to calculate the genetic contribution due to the familiar design used in the linear mixed model. A strength of this study is that it is conducted in a healthy Caucasian population and thus the potential impact of diseases is minimized. Furthermore, the blood samples were collected in a relatively small geographical area in Denmark in September to October 2010 and analysed in a single batch with LC-MS/MS with low variation. Furthermore, many known predictors of serum 25(OH)D concentrations were assessed by questionnaire data.

Genetic variants may accelerate or protect against vitamin D deficiency and the genetic effect is life-long. We speculate that individuals with genetically determined low vitamin D concentrations may need different health recommendations in order to improve their serum 25(OH)D concentrations thereby avoiding adverse health outcomes. A study by Engelman et al. [36] found that in women with no risk alleles of rs4588 and rs2060793 (in strong LD with rs10741657 as mentioned previously) who consumed at least 670 IU/d vitamin D all (100%) had 25(OH)D > 50 nmol/L. For women carrying 1, 2 or 3–4 risk alleles and consuming at least 670 IU/d vitamin D, only 84, 72, and 62% had 25(OH)D > 50 nmol/L. Furthermore, the percentage of women with adequate 25(OH)D concentrations rose with each increasing quartile of vitamin D intake. Thus, subjects with genetic predisposition seem to benefit from dietary vitamin D supplementation. In the study by Madsen et al. [28], vitamin D<sub>3</sub>-fortification of bread and milk reduced the decrease in serum 25(OH)D concentrations seen during winter and ensured 25(OH)D >50 nmol/L in healthy Danish families. Whether such a dietary intervention program could ensure adequate serum 25(OH)D

concentrations in subjects with genetic predisposition for vitamin D deficiency warrants further study.

## Conclusions

In conclusion, our results support the current evidence that common genetic variation in *GC* and *CYP2R1* may contribute to the variation of serum 25(OH)D concentrations in a healthy population. Notably, genetic risk score analysis revealed that non-carriers of risk alleles of *CYP2R1* rs10741657 and rs10766197, and/or *GC* rs4588 and rs842999 had statistically significantly higher serum 25(OH)D concentrations compared to carriers of all risk alleles.

## References

- Holick MF (2007) Vitamin D deficiency. *N Engl J Med* 357: 266–281. Available: <http://www.ncbi.nlm.nih.gov/pubmed/17634462>.
- Lips P, van Schoor NM (2011) The effect of vitamin D on bone and osteoporosis. *Best Pract Res Clin Endocrinol Metab* 25: 585–591. Available: <http://www.ncbi.nlm.nih.gov/pubmed/21872800>. Accessed 16 July 2012.
- Pilz S, Tomaschitz A, März W, Drechsler C, Ritz E, et al. (2011) Vitamin D, cardiovascular disease and mortality. *Clin Endocrinol (Oxf)* 75: 575–584. Available: <http://www.ncbi.nlm.nih.gov/pubmed/21682758>. Accessed 16 July 2012.
- Saliba W, Barnett-Griness O, Rennert G (2012) The relationship between obesity and the increase in serum 25(OH)D levels in response to vitamin D supplementation. *Osteoporos Int* 25. Available: <http://www.ncbi.nlm.nih.gov/pubmed/22955311>. Accessed 18 September 2012.
- Sung CC, Liao MT, Lu KC, Wu CC (2012) Role of vitamin d in insulin resistance. *J Biomed Biotechnol* 2012: 634195. Available: <http://www.ncbi.nlm.nih.gov/pubmed/22988423>. Accessed 19 September 2012.
- Brown SD, Calvert HH, Fitzpatrick AM (2012) Vitamin D and asthma: 137–145.
- Weinstock-Guttman B, Mehta BK, Ramanathan M, Karmon Y, Henson LJ, et al. (2012) Vitamin D and multiple sclerosis. *Neurologist* 18: 179–183. Available: <http://www.ncbi.nlm.nih.gov/pubmed/22735240>. Accessed 18 September 2012.
- Gandini S, Boniol M, Haukka J, Byrnes G, Cox B, et al. (2011) Meta-analysis of observational studies of serum 25-hydroxyvitamin D levels and colorectal, breast and prostate cancer and colorectal adenoma. *Int J Cancer* 128: 1414–1424. Available: <http://www.ncbi.nlm.nih.gov/pubmed/20473927>. Accessed 3 August 2011.
- Durup D, Jørgensen HL, Christensen J, Schwarz P, Heegaard AM, et al. (2012) A Reverse J-Shaped Association of All-Cause Mortality with Serum 25-Hydroxyvitamin D in General Practice, the CopD Study. *J Clin Endocrinol Metab* 25: 1–9. Available: <http://www.ncbi.nlm.nih.gov/pubmed/22573406>. Accessed 16 May 2012.
- Melamed ML, Michos ED, Post W, Astor B (2008) 25-hydroxyvitamin D levels and the risk of mortality in the general population. *Arch Intern Med* 168: 1629–1637. Available: <http://www.ncbi.nlm.nih.gov/pubmed/20185562>.
- Jones G, Strugnell S a, DeLuca HF (1998) Current understanding of the molecular actions of vitamin D. *Physiol Rev* 78: 1193–1231. Available: <http://www.ncbi.nlm.nih.gov/pubmed/9790574>.
- Carter GD (2011) Accuracy of 25-hydroxyvitamin D assays: confronting the issues. *Curr Drug Targets* 12: 19–28. Available: <http://www.ncbi.nlm.nih.gov/pubmed/20795940>.
- Dastani Z, Li R, Richards B (2013) Genetic regulation of vitamin d levels. *Calcif Tissue Int* 92: 106–117. Available: <http://www.ncbi.nlm.nih.gov/pubmed/23114382>. Accessed 4 February 2013.
- Burgaz A, Akesson A, Oster A, Michaëlsson K, Wolk A (2007) Associations of diet, supplement use, and ultraviolet B radiation exposure with vitamin D status in Swedish women during winter. *Am J Clin Nutr* 86: 1399–1404. Available: <http://www.ncbi.nlm.nih.gov/pubmed/17991652>.
- Shea MK, Benjamin EJ, Dupuis J, Massaro JM, Jacques PF, et al. (2009) Genetic and non-genetic correlates of vitamins K and D. *Eur J Clin Nutr* 63: 458–464. Available: <http://www.pubmedcentral.nih.gov/articlerender.fcgi?artid=2681093&tool=pmcentrez&rendertype=abstract>. Accessed 1 March 2012.
- Arguelles LM, Langman CB, Ariza AJ, Ali FN, Dille K, et al. (2009) Heritability and environmental factors affecting vitamin D status in rural Chinese adolescent twins. *J Clin Endocrinol Metab* 94: 3273–3281. Available: <http://www.pubmedcentral.nih.gov/articlerender.fcgi?artid=2741721&tool=pmcentrez&rendertype=abstract>. Accessed 1 March 2012.
- Engelman CD, Fingerlin TE, Langefeld CD, Hicks PJ, Rich SS, et al. (2008) Genetic and environmental determinants of 25-hydroxyvitamin D and 1,25-dihydroxyvitamin D levels in Hispanic and African Americans. *J Clin Endocrinol Metab* 93: 3381–3388. Available: <http://www.pubmedcentral.nih.gov/articlerender.fcgi?artid=2567851&tool=pmcentrez&rendertype=abstract>. Accessed 1 March 2012.
- Hunter D, De Lange M, Snieder H (2001) Genetic Contribution of Bone Metabolism, Calcium Excretion and Vitamin D and Parathyroid Hormone Regulation. 16: 371–378.
- Karohl C, Su S, Kumari M, Tangpricha V, Veleard E, et al. (2010) Heritability and seasonal variability of vitamin D concentrations. 25: 1393–1398. doi:10.3945/ajcn.2010.30176.1.
- Snellman G, Melhus H, Gedeberg R, Olofsson S, Wolk A, et al. (2009) Seasonal genetic influence on serum 25-hydroxyvitamin D levels: a twin study. *PLoS One* 4: e7747. Available: <http://www.pubmedcentral.nih.gov/articlerender.fcgi?artid=2774516&tool=pmcentrez&rendertype=abstract>. Accessed 13 September 2012.
- Wjst M, Altmüller J, Faus-Kessler T, Braig C, Bahnweg M, et al. (2006) Asthma families show transmission disequilibrium of gene variants in the vitamin D metabolism and signalling pathway. *Respir Res* 7: 60. Available: <http://www.pubmedcentral.nih.gov/articlerender.fcgi?artid=1508148&tool=pmcentrez&rendertype=abstract>. Accessed 1 March 2012.
- Signorello LB, Shi J, Cai Q, Zheng W, Williams SM, et al. (2011) Common variation in vitamin D pathway genes predicts circulating 25-hydroxyvitamin D Levels among African Americans. *PLoS One* 6: e28623. Available: <http://www.pubmedcentral.nih.gov/articlerender.fcgi?artid=3244405&tool=pmcentrez&rendertype=abstract>. Accessed 1 March 2012.
- McGrath JJ, Saha S, Burne TH, Eyles DW (2010) A systematic review of the association between common single nucleotide polymorphisms and 25-hydroxyvitamin D concentrations. *J Steroid Biochem Mol Biol* 121: 471–477. Available: <http://www.ncbi.nlm.nih.gov/pubmed/20363324>. Accessed 29 February 2012.
- Ahn J, Yu K, Stolzenberg-Solomon R, Simon KC, McCullough ML, et al. (2010) Genome-wide association study of circulating vitamin D levels. *Hum Mol Genet* 19: 2739–2745. Available: <http://www.pubmedcentral.nih.gov/articlerender.fcgi?artid=2883344&tool=pmcentrez&rendertype=abstract>. Accessed 17 June 2011.
- Wang TJ, Zhang F, Richards JB, Kestenbaum B, van Meurs JB, et al. (2010) Common genetic determinants of vitamin D insufficiency: a genome-wide association study. Available: <http://www.pubmedcentral.nih.gov/articlerender.fcgi?artid=3086761&tool=pmcentrez&rendertype=abstract>. Accessed 1 March 2012.
- Thuesen B, Husemoen L, Fenger M, Jakobsen J, Schwarz P, et al. (2012) Determinants of vitamin D status in a general population of Danish adults. *Bone* 50: 605–610. Available: <http://www.ncbi.nlm.nih.gov/pubmed/22227435>. Accessed 19 March 2012.
- Hollis BW, Wagner CL, Drezner MK, Binkley NC (2007) Circulating vitamin D3 and 25-hydroxyvitamin D in humans: An important tool to define adequate nutritional vitamin D status. *J Steroid Biochem Mol Biol* 103: 631–634. Available: <http://www.pubmedcentral.nih.gov/articlerender.fcgi?artid=1868557&tool=pmcentrez&rendertype=abstract>. Accessed 4 December 2013.
- Madsen KH, Rasmussen LB, Andersen R, Molgaard C, Jakobsen J, et al. (2013) Randomized controlled trial of the effects of vitamin D – fortified milk and bread on serum 25-hydroxyvitamin D concentrations in families in Denmark during winter: the VitmaD study 1 – 3. *Am J Clin Nutr*: 1–9. doi:10.3945/ajcn.113.059469.
- Miller S, Dykes D, Polesky H (1988) A simple salting out procedure for extracting DNA from human nucleated cells. *NucleicAcids Res* 16: 55404.
- Cole TJ, Bellizzi MC, Flegal KM, Dietz WH (2000) Establishing a standard definition for child overweight and obesity worldwide: international survey. *BMJ* 320: 1240–1243. Available: <http://www.pubmedcentral.nih.gov/articlerender.fcgi?artid=27365&tool=pmcentrez&rendertype=abstract>.
- World Health Organization (2000) Obesity: preventing and managing the global epidemic. Report of a WHO consultation. WHO Heal Organ Tech Rep Ser 894: 1–253.
- Ramos-lopez E, Brück P (2007) CYP2R1 ( vitamin D 25-hydroxylase ) gene is associated with susceptibility to type 1 diabetes and vitamin D levels in Germans. *Diabetes Metab Res Rev* 1: 631–636. doi:10.1002/dmrr.
- Bu FX, Armas L, Lappe J, Zhou Y, Gao G, et al. (2010) Comprehensive association analysis of nine candidate genes with serum 25-hydroxy vitamin D

## Acknowledgments

The authors would like to acknowledge all the families for their participation in the VitmaD intervention.

## Author Contributions

Conceived and designed the experiments: LBR GRH RA HM KHM UV JN. Performed the experiments: JN KHM BH. Analyzed the data: JN BH UV. Contributed reagents/materials/analysis tools: JN EWA GRH. Wrote the paper: JN UV.

- levels among healthy Caucasian subjects. *Hum Genet* 128: 549–556. Available: <http://www.ncbi.nlm.nih.gov/pubmed/20809279>. Accessed 16 August 2011.
34. Lasky-Su J, Lange N, Brehm JM, Damask A, Soto-Quiros M, et al. (2012) Genome-wide association analysis of circulating vitamin D levels in children with asthma. *Hum Genet* 131: 1495–1505. Available: <http://www.ncbi.nlm.nih.gov/pubmed/22673963>. Accessed 29 August 2012.
  35. Zhang Z, He JW, Fu WZ, Zhang CQ, Zhang ZL (2013) An analysis of the association between the vitamin D pathway and serum 25-hydroxyvitamin D levels in a healthy Chinese population. *J Bone Miner Res*. Available: <http://www.ncbi.nlm.nih.gov/pubmed/23505139>. Accessed 25 March 2013.
  36. Engelman CD, Meyers KJ, Iyengar SK, Liu Z, Karki CK, et al. (2013) Vitamin D Intake and Season Modify the Effects of the GC and CYP2R1 Genes on 25-hydroxyvitamin D concentrations. 25: 17–26. doi:10.3945/jn.112.169482.17.
  37. Bikle D, Gee E, Halloran B, Kowalski M, Ryzan E, et al. (1986) Assessment of the free fraction of 25-hydroxyvitamin D in serum and its regulation by albumin and the vitamin D-binding protein. *J Clin Endocrinol Metab* 63: 954–959.
  38. Abbas S, Linseisen J, Slinger T, Kropp S, Mutschelknauss EJ, et al. (2008) The Gc2 allele of the vitamin D binding protein is associated with a decreased postmenopausal breast cancer risk, independent of the vitamin D status. *Cancer Epidemiol Biomarkers Prev* 17: 1339–1343. Available: <http://www.ncbi.nlm.nih.gov/pubmed/18559548>. Accessed 1 March 2012.
  39. Fu L, Yun F, Oczak M, Wong BY, Vieth R, et al. (2009) Common genetic variants of the vitamin D binding protein (DBP) predict differences in response of serum 25-hydroxyvitamin D [25(OH)D] to vitamin D supplementation. *Clin Biochem* 42: 1174–1177. Available: <http://www.ncbi.nlm.nih.gov/pubmed/19302999>. Accessed 1 March 2012.
  40. Fang Y, van Meurs JB, Arp P, van Leeuwen JP, Hofman A, et al. (2009) Vitamin D binding protein genotype and osteoporosis. *Calcif Tissue Int* 85: 85–93. Available: <http://www.pubmedcentral.nih.gov/articlerender.fcgi?artid=2729412&tool=pmcentrez&rendertype=abstract>. Accessed 1 March 2012.
  41. Gozdzik A, Zhu J, Wong BY, Fu L, Cole DE, et al. (2011) Association of vitamin D binding protein (VDBP) polymorphisms and serum 25(OH)D concentrations in a sample of young Canadian adults of different ancestry. *J Steroid Biochem Mol Biol* 127:405–412. Available: <http://www.ncbi.nlm.nih.gov/pubmed/21684333>. Accessed 25 October 2011.
  42. Sinotte M, Diorio C, Berube S, Pollak M, Brisson J (2009) Genetic polymorphisms of the vitamin D binding protein and plasma concentrations of 25-hydroxyvitamin D in premenopausal women 1–3. *Am J Clin Nutr* 25: 634–640. doi:10.3945/ajcn.2008.26445. INTRODUCTION.
  43. Lauridsen AL, Vestergaard P, Hermann AP, Brot C, Heickendorff L, et al. (2005) Plasma concentrations of 25-hydroxy-vitamin D and 1,25-dihydroxy-vitamin D are related to the phenotype of Gc (vitamin D-binding protein): a cross-sectional study on 595 early postmenopausal women. *Calcif Tissue Int* 77: 15–22. Available: <http://www.ncbi.nlm.nih.gov/pubmed/15868280>. Accessed 1 March 2012.
  44. Kurylowicz A, Ramos-Lopez E, Bednarczuk T, Badenhoop K (2006) Vitamin D-binding protein (DBP) gene polymorphism is associated with Graves' disease and the vitamin D status in a Polish population study. *Exp Clin Endocrinol Diabetes* 114:329–335 Available: <http://www.ncbi.nlm.nih.gov/pubmed/16868893>. Accessed 1 March 2012.
  45. Lu L, Sheng H, Li H, Gan W, Liu C, et al. (2012) Associations between common variants in GC and DHCR7/NADSYN1 and vitamin D concentration in Chinese Hans. *Hum Genet* 131:505–512 Available: <http://www.ncbi.nlm.nih.gov/pubmed/21972121>. Accessed 1 March 2012.
  46. Arnaud J, Constans J (1993) Affinity differences for vitamin D metabolites associated with the genetic isoforms of the human serum carrier protein (DBP). *Hum Genet* 92:183–188 Available: <http://link.springer.com/article/10.1007/BF00219689>. Accessed 25 July 2013.
  47. Kawakami M, Blum C, Ramakrishnan R, Dell R, Goodman D (1981) Turnover of the plasma binding protein for vitamin D and its metabolites in normal human subjects. *J Clin Endocrinol Metab* 1110–1116.
  48. Kamboh MI, Ferrell RE (1986) Ethnic variation in vitamin D-binding protein (GC): a review of isoelectric focusing studies in human populations. *Hum Genet* 72: 281–293. Available: <http://www.ncbi.nlm.nih.gov/pubmed/3516862>.
  49. Perna L (2013) Genetic Variations in the Vitamin D Binding Protein and Season-Specific Levels of Vitamin D Among Older Adults. *Epidemiology* 24: 104–109. Available: <http://www.pubmedcentral.nih.gov/articlerender.fcgi?artid=3150431&tool=pmcentrez&rendertype=abstract>. Accessed 5 June 2013.
  50. Ahn J, Albanes D, Berndt SI, Peters U, Chatterjee N, et al. (2009) Vitamin D-related genes, serum vitamin D concentrations and prostate cancer risk. *Carcinogenesis* 30: 769–776 Available: <http://www.pubmedcentral.nih.gov/articlerender.fcgi?artid=2675652&tool=pmcentrez&rendertype=abstract>. Accessed 1 March 2012.
  51. Jorde R, Schirmer H, Wilsgaard T, Joakimsen RM, Mathiesen EB, et al. (2012) Polymorphisms related to the serum 25-hydroxyvitamin d level and risk of myocardial infarction, diabetes, cancer and mortality. The tromsø study. *PLoS One* 7: e37295. Available: <http://www.pubmedcentral.nih.gov/articlerender.fcgi?artid=3359337&tool=pmcentrez&rendertype=abstract>. Accessed 7 June 2012.
  52. Berry DJ, Vimalaswaran KS, Whittaker JC, Hingorani AD, Hyppönen E (2012) Evaluation of Genetic Markers as Instruments for Mendelian Randomization Studies on Vitamin D. *PLoS One* 7: e37465. Available: <http://dx.plos.org/10.1371/journal.pone.0037465>. Accessed 21 May 2012.
  53. National Board of Health (2010) Forebyggelse, diagnostik og behandling af D-vitaminmangel (Prevention, diagnostics and treatment of vitamin D deficiency). *Natl Board Heal*. Available: <http://sundhedsstyrelsen.dk/~media/FA2FC43A29D146918C9695BEC2716A33.ashx>. Accessed 2014 February 1.
